# Supplementary material for: Block copolymers containing stable radical and fluorinated blocks with long-range ordered morphologies prepared by anionic polymerization
Source: Royal Society of Chemistry journal article supplement (doi:10.1039/c9py00416e), 2019-01-01
Supplement: c9py00416e1.pdf [file c9py00416e1.pdf]

*Supplemental Information for:*  
*Block copolymers containing stable radical and fluorinated blocks with long-range ordered morphologies prepared by anionic polymerization*

Alicia Cintora<sup>a</sup>, Hiroki Takano<sup>b</sup>, Mohit Khurana<sup>a</sup>, Alvin Chandra<sup>b</sup>, Teruaki Hayakawa<sup>b</sup>, Christopher K. Ober<sup>\*a</sup>

<sup>a</sup>. Department of Materials Science and Engineering, Cornell University, Ithaca, NY, 14853, USA.

<sup>b</sup>. Department of Materials Science and Engineering, School of Materials and Chemical Technology, Tokyo Institute of Technology, 2-12-1-S8-36 Ookayama, Meguro-ko, Tokyo, Japan.

**Table S1** Molecular weight, dispersities and yield of PTFEMA homopolymers using various [Na<sup>+</sup>]:[DB18C6] ratios. All reactions had a molecular weight target of 50,000 g/mol.

| Entry | [I]:[Na <sup>+</sup> ]:[DB18C6] | NMR <sup>a</sup>             | SEC <sup>b</sup> | Yield |
|-------|---------------------------------|------------------------------|------------------|-------|
|       |                                 | $M_n$ (g mol <sup>-1</sup> ) | $\bar{D}$        |       |
| 1     | 1:5:0                           | 4,500                        | 2.33             | 12.1% |
| 2     | 1:0:10                          | 25,500                       | 1.86             | 43.8% |
| 3     | 1:1:1                           | 2,900                        | 1.43             | 3.6%  |
| 4     | 1:5:5                           | 10,200                       | 1.64             | 85.7% |

<sup>a</sup> Determined by <sup>1</sup>H NMR (500 MHz, THF d-8). <sup>b</sup> Determined by SEC (THF, PS Standards).

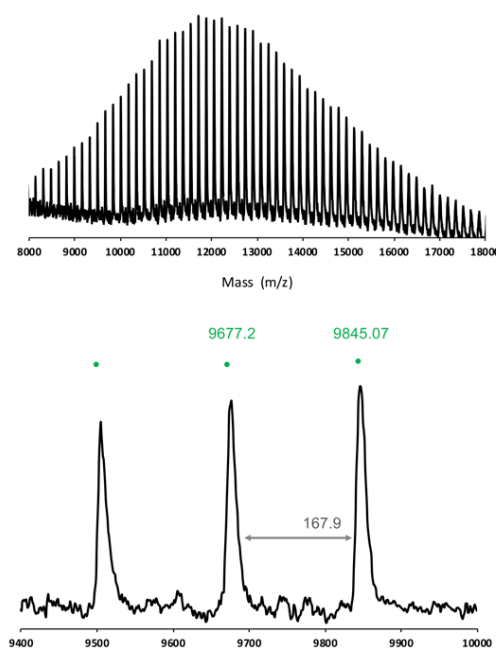

**Figure S1.** MALDI-TOF-MS spectrum of PTFEMA synthesized using a Na<sup>+</sup>/DB18C6 counterion complex

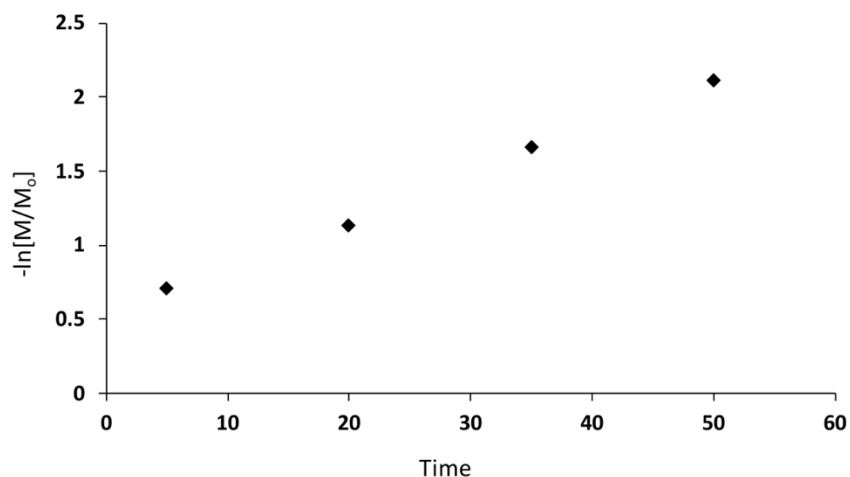

**Figure S2.** Kinetics plot of a PTMA homopolymerization with target molecular weight of 8,000 g/mol. Aliquots of samples were taken at 15 minute intervals for 50 minutes.

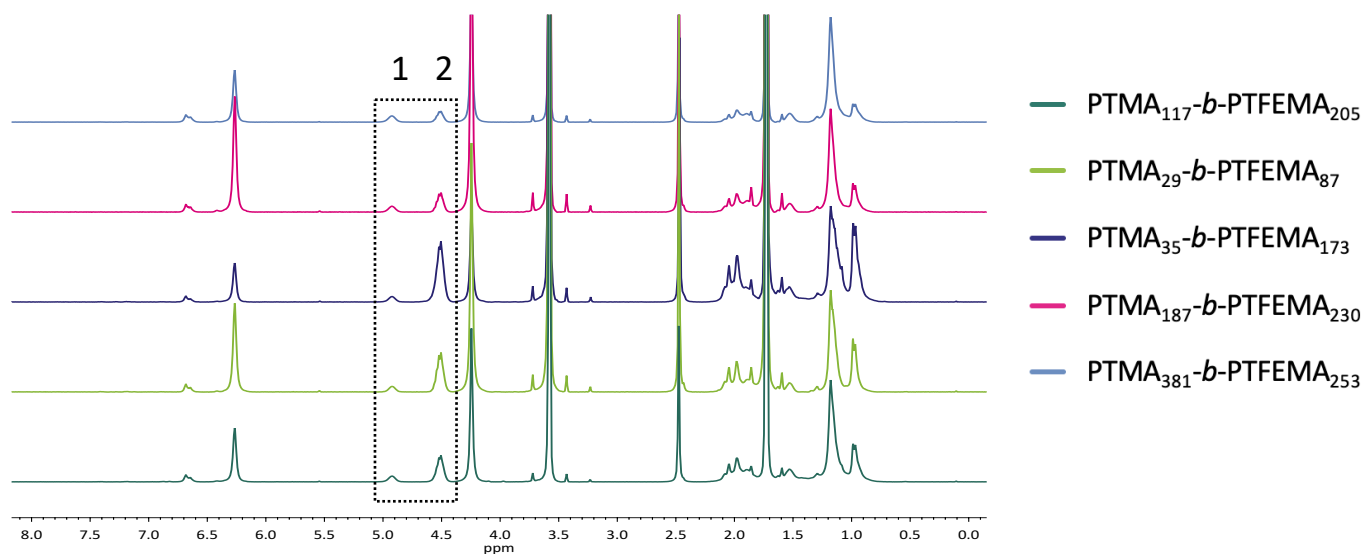

**Figure S3.**  $^1\text{H}$  NMR spectrum (THF,  $d_8$ ) of all PTMA-*b*-PTFEMA block copolymers reduced with pentafluorophenylhydrazine. The PTMA and PTFEMA peaks used to quantify block ratios are labeled (1 and 2, respectively).

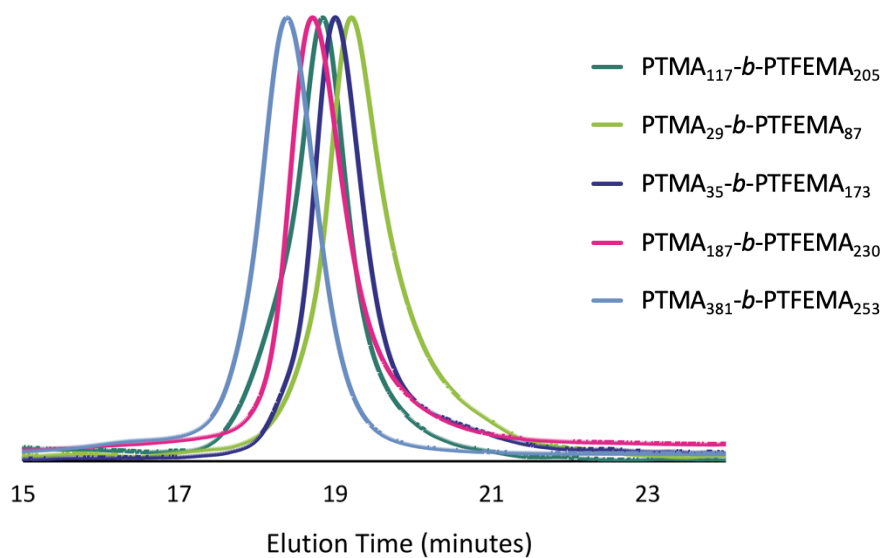

**Figure S4.** GPC traces of all PTMA-*b*-PTFEMA block copolymers with THF as eluent.

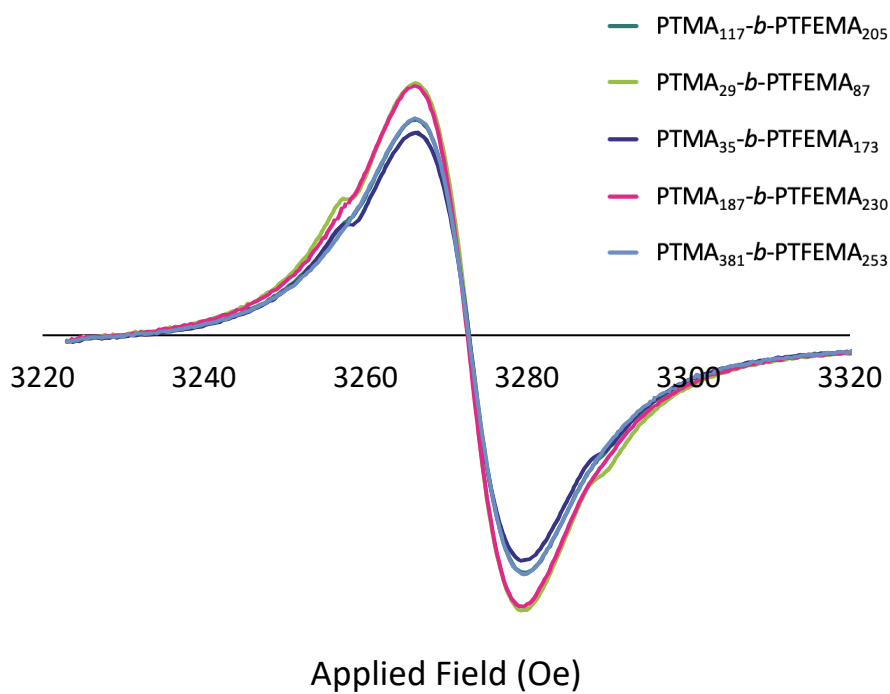

**Figure S5.** EPR spectra of all PTMA-*b*-PTFEMA polymers dissolved in THF at a 1mM radical concentration.

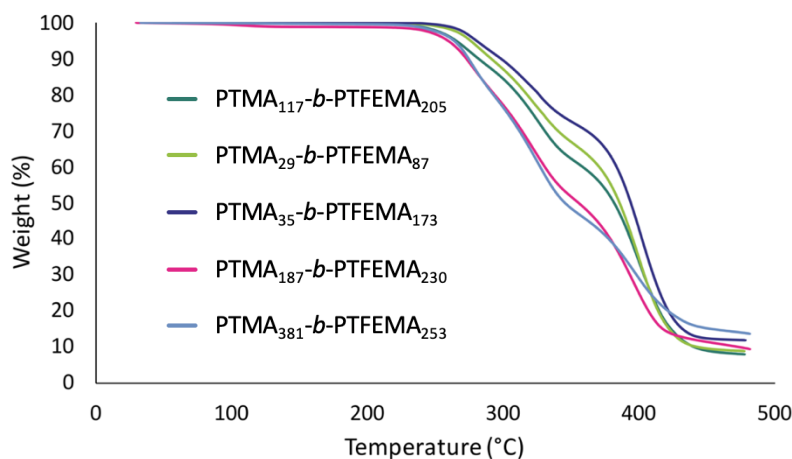

**Figure S6.** TGA analysis of all PTMA-b-PTFEMA block copolymers.

TGA traces were collected on a TA Instruments TGA Q500 using a 10°C/min rate, heating up to 445°C. Traces were evaluated with TA Instruments Universal Analysis 2000.

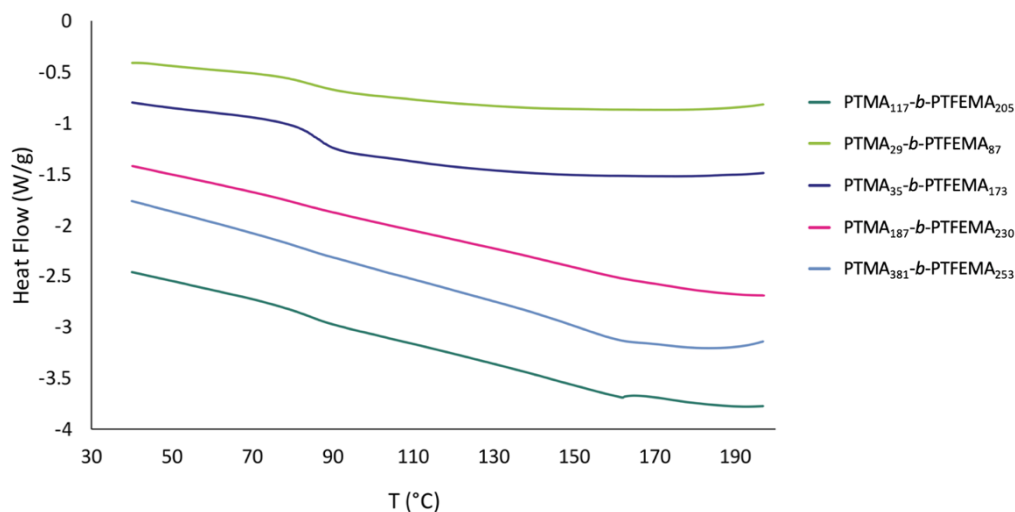

**Figure S7.** DSC analysis of all PTMA-b-PTFEMA block copolymers.

DSC traces were collected on a TA Instruments DSC Q2000 using a 10°C/min rate, heating up to 200°C. Traces were evaluated with TA Instruments Universal Analysis 2000.

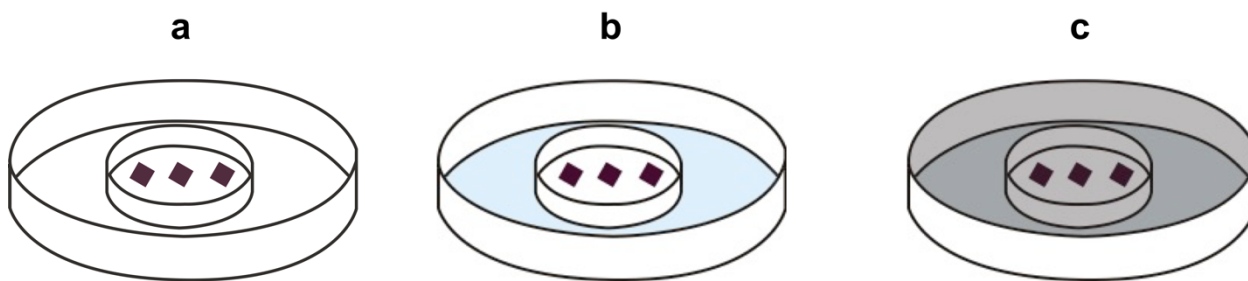

**Figure S8.** Schematic of glass chamber used to vapor-anneal block copolymer thin films

To anneal, spin-coated polymer samples on 1x1cm Si wafer pieces were placed in a glass chamber (composed of petri dishes of various sizes) which held both thin film samples and annealing solvent together, but without contact. To the larger petri dish, 10-15 mL of chloroform were added (Fig. S8b) to create a pool of annealing solvent around a smaller petri dish containing the thin film polymer samples. Once the annealing solvent was added, the glass chamber was enclosed with a lid (Fig. S8c) and annealed for 6 hours.

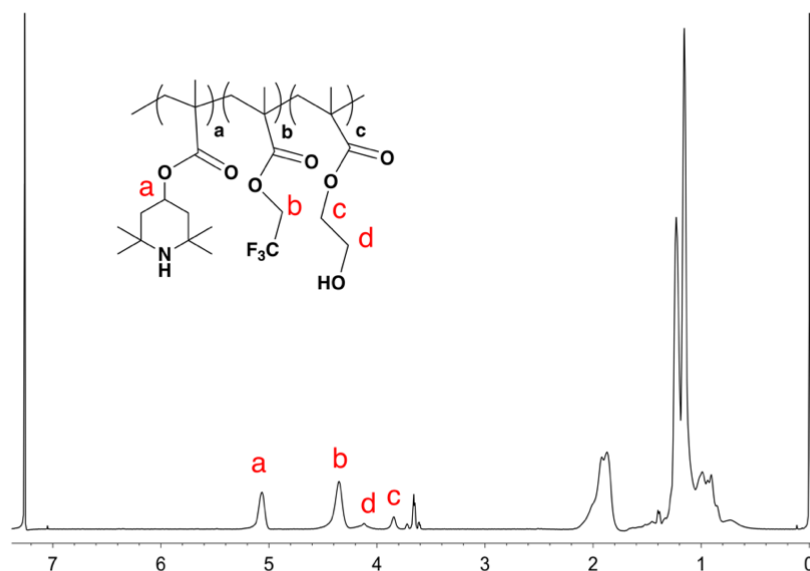

**Figure S9.**  $^1\text{H}$  NMR (500 MHz in  $\text{CDCl}_3$ ) spectra of the precursor polymer of PTMA-ran-PTFEMA-ran-PHEMA (RTP-1) before oxidation.

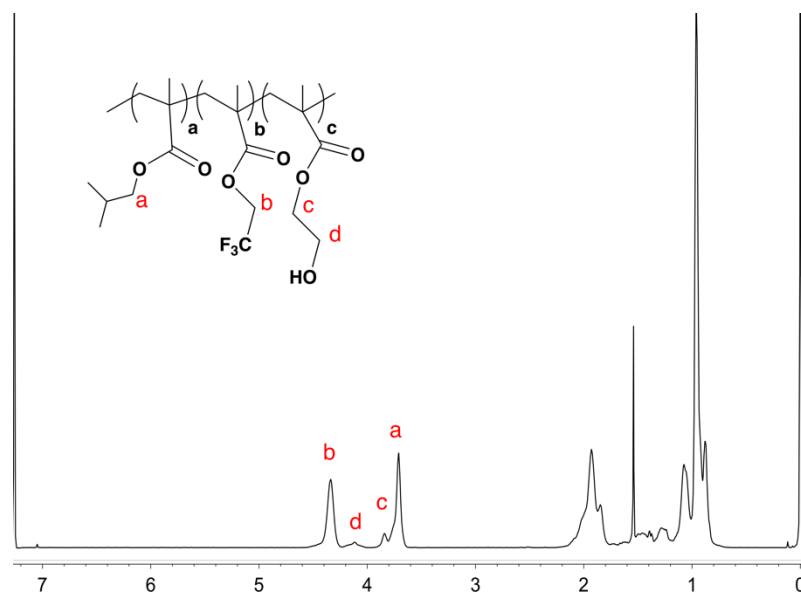

**Figure S10.**  $^1\text{H}$  NMR spectra (500 MHz in  $\text{CDCl}_3$ ) of the precursor polymer of PTMA-ran-PTFEMA-ran-PHEMA (RTP-1) before oxidation.

**Table S2** Random terpolymer (neutral underlayer) characteristics.

| Sample | $f_{\text{TMA/iBMA}}^a$ | $f_{\text{TFEMA}}^a$ | $f_{\text{HEMA}}^a$ | $M_n^b$ | $\bar{D}^b$ |
|--------|-------------------------|----------------------|---------------------|---------|-------------|
| RTP-1  | 0.52 (TMA)              | 0.42                 | 0.06                | 6,200   | 1.40        |
| RTP-2  | 0.47 (iBMA)             | 0.47                 | 0.06                | 7,400   | 1.64        |

<sup>a</sup> Determined by  $^1\text{H}$  NMR (500 MHz,  $\text{CDCl}_3$ ). <sup>b</sup> Determined by SEC (THF, PS Standards).

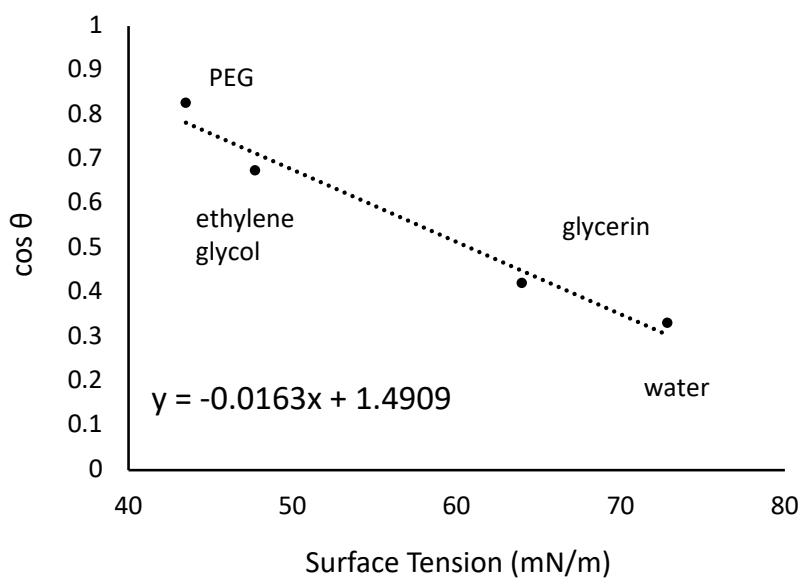

**Figure S11.** Zisman plot used to estimate the surface energy PTMA.
